# Supplementary material
Source: Springer Nature journal article supplement (https://www.springermedizin.de/resource/supplementary/12885_2011_2883_MOESM14_ESM.pdf/9462152)

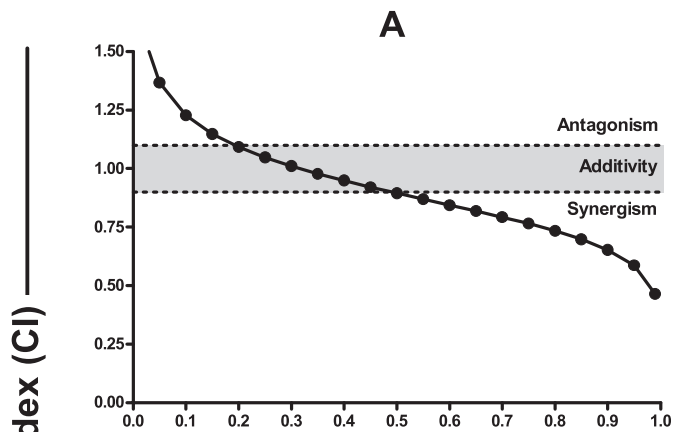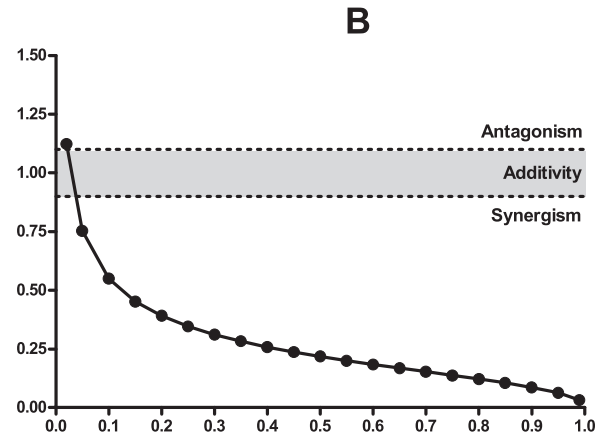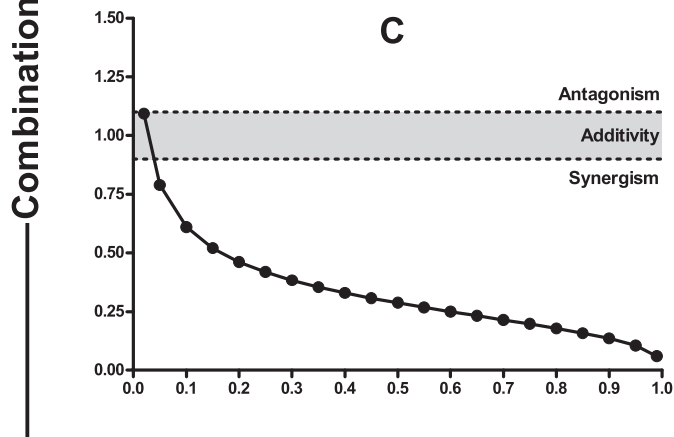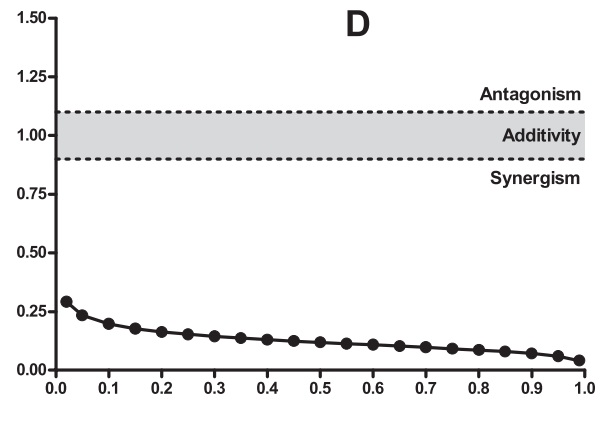

Fraction Affected

Supplement: MOESM14 [file 9462152]
